# Supplementary material for: Effects of aerosols on precipitation in north-eastern North America
Source: Copernicus journal article supplement (doi:10.5194/acp-14-5111-2014), 2014-05-26
Supplement: Supplementary file 1 [file acp-14-5111-2014-supplement.pdf]

Supplement of Atmos. Chem. Phys., 14, 5111–5125, 2014  
<http://www.atmos-chem-phys.net/acp-14-5111-2014/>  
doi:10.5194/acp-14-5111-2014-supplement  
© Author(s) 2014. CC Attribution 3.0 License.

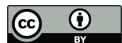

*Supplement of*

## **Effects of aerosols on precipitation in north-eastern North America**

**R. Mashayekhi and J. J. Sloan**

*Correspondence to:* J. J. Sloan (sloanj@uwaterloo.ca)

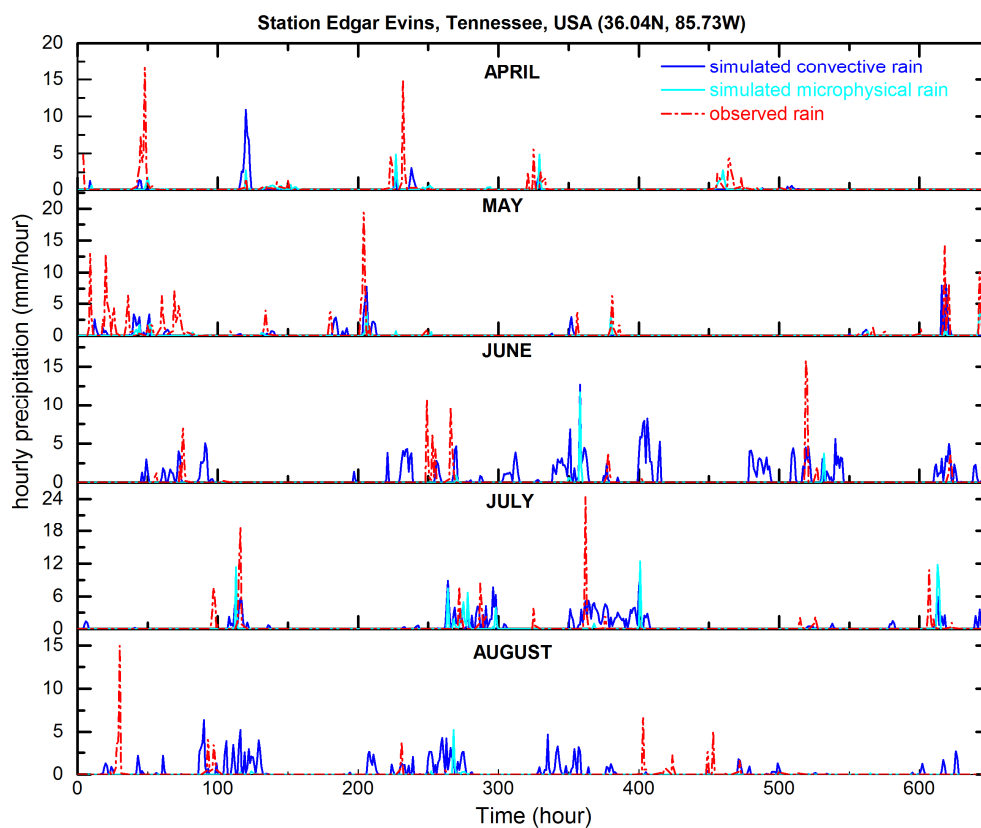

Figure S1. Comparison of simulated hourly convective and non-convective (microphysical) precipitation with the observations for individual months from April to August 2009.
